# Supplementary material for: Preparation of C/Ho co-doped TiO2 for enhancing the photocatalytic degradation efficiency of tetracycline hydrochloride
Source: Royal Society of Chemistry journal article supplement (doi:10.1039/d2nj00632d), 2022-01-01
Supplement: d2nj00632d1.pdf [file d2nj00632d1.pdf]

## SUPPORTING INFORMATION

Preparation of C/Ho co-doped TiO<sub>2</sub> for enhancing the photocatalytic  
degradation efficiency of tetracycline hydrochloride

**Fang-Di Wu**<sup>a, b</sup>, **Jyh-Cherng Chen**<sup>a, \*</sup>, **Zi-Tao Yang**<sup>b</sup>

a. Department of Environmental Engineering and Science, Feng Chia University,

Taichung, Taiwan

b. Fujian Provincial Key Laboratory of Eco-Industrial Green Technology, Wuyi

University, Wuyishan, China

\* Corresponding author.

Address: Department of Environmental Engineering and Science, Feng Chia

University, No. 100, Wenhwa Rd., Seatwen, Taichung, Taiwan 40724, R.O.C.

E-mail: [jccchen2@mail.fcu.edu.tw](mailto:jccchen2@mail.fcu.edu.tw)

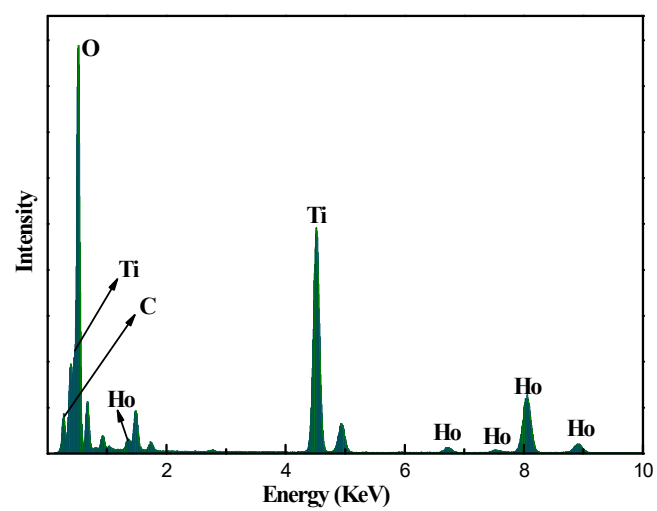

Fig. S1. Energy dispersive spectroscopy (EDS) spectrum of CHT-0.05

Table S1 Element content of CHT-0.05

| Element | Atomic Fraction (%) | Mass Fraction (%) |
|---------|---------------------|-------------------|
| C       | 10.85               | 5.4               |
| O       | 61.59               | 41.56             |
| Ti      | 26.79               | 48.47             |
| Ho      | 0.77                | 4.57              |
